# Supplementary material for: Graph construction method impacts variation representation and analyses in a bovine super-pangenome
Source: PubMed Central journal article supplement (PMC10204317; doi:10.1186/s13059-023-02969-y), 2023-05-22
Supplement: 13059_2023_2969_MOESM2_ESM.pdf [file 13059_2023_2969_MOESM2_ESM.pdf]

| Tool      | CPU hours | Memory (GB) | Variants   |
|-----------|-----------|-------------|------------|
| minigraph | 0.2       | 0.5         | 164,723    |
| pggb      | 10.1      | 11.1        | 57,350,905 |
| cactus    | 28.3      | 12.8        | 61,028,922 |
