# Supplementary material for: Graph construction method impacts variation representation and analyses in a bovine super-pangenome
Source: PubMed Central journal article supplement (PMC10204317; doi:10.1186/s13059-023-02969-y), 2023-05-22
Supplement: 13059_2023_2969_MOESM3_ESM.pdf [file 13059_2023_2969_MOESM3_ESM.pdf]

| Sample  | Technology | Coverage | Minigraph | Pggb  | Cactus | Assembly |
|---------|------------|----------|-----------|-------|--------|----------|
| Nellore | OM         | 200x     | 813       | 780   | 597    | 744      |
| ANG     | OM         | 80x      | 191       | 177   | 153    | 158      |
| BRA     | OM         | 80x      | 351       | 316   | 245    | 295      |
| OBV     | ONT        | 17x      | 0.763     | 0.773 | 0.709  | 0.803    |
| BSW     | ONT        | 55x      | 0.777     | 0.780 | 0.713  | 0.812    |
| PIE     | ONT        | 83x      | 0.746     | 0.757 | 0.693  | 0.780    |
| NEL     | ONT        | 48x      | 0.840     | 0.842 | 0.786  | 0.893    |
| GAU     | ONT        | 73x      | 0.871     | 0.860 | 0.816  | 0.918    |
