# Supplementary material for: Graph construction method impacts variation representation and analyses in a bovine super-pangenome
Source: PubMed Central journal article supplement (PMC10204317; doi:10.1186/s13059-023-02969-y), 2023-05-22
Supplement: 13059_2023_2969_MOESM5_ESM.pdf [file 13059_2023_2969_MOESM5_ESM.pdf]

|           | Relaxed |                |     |        | Strict |                |     |        |
|-----------|---------|----------------|-----|--------|--------|----------------|-----|--------|
|           | Edits   | Query coverage | CPU | Memory | Edits  | Query coverage | CPU | Memory |
| minigraph | 2285    | 99.6           | 50  | 0.7    | 2285   | 99.6           | 99  | 1.0    |
| cactus    | 0       | 0              | 164 | 6.9    | 18     | 100            | 244 | 14.1   |
| pggb      | 0       | 0              | 140 | 5.1    | 17     | 100            | 189 | 8.1    |
