# Supplementary material for: Graph construction method impacts variation representation and analyses in a bovine super-pangenome
Source: PubMed Central journal article supplement (PMC10204317; doi:10.1186/s13059-023-02969-y), 2023-05-22
Supplement: 13059_2023_2969_MOESM6_ESM.pdf [file 13059_2023_2969_MOESM6_ESM.pdf]

|           | CPU hours |              |          |              | Memory (GB) |              |          |              |
|-----------|-----------|--------------|----------|--------------|-------------|--------------|----------|--------------|
|           | Included  |              | Held-out |              | Included    |              | Held-out |              |
|           | Bulk      | Centro-/telo | Bulk     | Centro-/telo | Bulk        | Centro-/telo | Bulk     | Centro-/telo |
| pggb      | 3.7       | 2.4          | 121.1    | 1.8          | 31.7        | 109.8        | 108.2    | 79.6         |
| cactus    | 5.6       | 0.9          | 73.2     | 1.3          | 130.4       | 99.4         | 349.5    | 126.9        |
| minigraph | 2.6       | 1.3          | 2.8      | 1.3          | 4.5         | 4.3          | 20.8     | 1.9          |
