# Supplementary material for: Graph construction method impacts variation representation and analyses in a bovine super-pangenome
Source: PubMed Central journal article supplement (PMC10204317; doi:10.1186/s13059-023-02969-y), 2023-05-22
Supplement: 13059_2023_2969_MOESM8_ESM.pdf [file 13059_2023_2969_MOESM8_ESM.pdf]

| Pangenome | Sample | Chromosome | Reference coordinates | Sample coordinates  | $\Delta$ bp |
|-----------|--------|------------|-----------------------|---------------------|-------------|
| minigraph | YAK    | 5          | 118527963-118528562   | 118396757-118426843 | 29.5 Kb     |
| pggb      | NEL    | 13         | 11057154-11057352     | 16184369-23015882   | 6.8 Mb      |
| cactus    | NEL    | 1          | 121617962-121618026   | 58878820-125260767  | 66.4 Mb     |
| cactus    | SIM    | 4          | 3319408-3319495       | 3310542-113157354   | 109.8 Mb    |
| cactus    | BIS    | 8          | 71781915-71781975     | 23187990-108691932  | 85.5 Mb     |
| cactus    | BIS    | 12         | 6381693-6381754       | 657155-36976359     | 36.3 Mb     |
| cactus    | GAU    | 12         | 6381693-6381754       | 439517-36663196     | 36.2 Mb     |
| cactus    | YAK    | 12         | 6381693-6381754       | 107663-36390629     | 36.3 Mb     |
