# Supplementary material for: Graph construction method impacts variation representation and analyses in a bovine super-pangenome
Source: PubMed Central journal article supplement (PMC10204317; doi:10.1186/s13059-023-02969-y), 2023-05-22
Supplement: 13059_2023_2969_MOESM9_ESM.pdf [file 13059_2023_2969_MOESM9_ESM.pdf]

| L (bp) | CPU hours | Warnings | Bubbles   | Nodes      | Non-reference bases (Mb) | VNTR overlaps |
|--------|-----------|----------|-----------|------------|--------------------------|---------------|
| 50     | 13.45     | 131      | 153,865   | 425,245    | 108.85                   | 5,742         |
| 30     | 14.80     | 152      | 220,761   | 611,795    | 110.66                   | 6,552         |
| 10     | 15.32     | 222      | 709,032   | 1,977,837  | 118.07                   | 7,613         |
| 5      | 29.35     | 484      | 1,571,642 | 4,613,837  | 128.20                   | 7,898         |
| 2      | 53.37     | 24,678   | 8,125,250 | 26,623,047 | 220.19                   | 8,441         |
